# Supplementary material for: Nitrogen-doped carbon dots for sensitive detection of ferric ions and monohydrogen phosphate by the naked eye and imaging in living cells
Source: Royal Society of Chemistry journal article supplement (doi:10.1039/d0na00769b), 2020-12-11
Supplement: d0na00769b1.pdf [file d0na00769b1.pdf]

## Supplementary Information

### Nitrogen-doped Carbon dots for the Sensitive Detection of Ferric Ions and Monohydrogen Phosphate by Naked Eye and Imaging in Living Cells

Qiaoling Liu,\* Borong Ren, Kaixin Xie, Yanmei Yan, Ruirong, Liu, Shiyu Lv, Qing He, Boru Yang, Lin Li\*

*Department of Chemistry, Taiyuan Normal University, Jinzhong 030619, P. R. China.*

\*E-mail: [liuqiaoling@tynu.edu.cn](mailto:liuqiaoling@tynu.edu.cn), Tel: +86-351-2886580;

\*E-mail: [lilin@tynu.edu.cn](mailto:lilin@tynu.edu.cn). Tel: +86-351-2886580

## Contents

1. Determination of fluorescence quantum yield
2. Supplementary Figures and Table S1 and Table S2.
3. References

## 1. Determination of fluorescence quantum yield

Fluorescence quantum yield was measured by a standard method in air-equilibrated sample at room temperature. The fluorescence quantum yield was determined by using Rhodamine B ( $\Phi=0.31$  in water) as reference.<sup>1, 2</sup>

$$\Phi_{sam} = \Phi_{ref} \frac{I_{sam}}{I_{ref}} \cdot \frac{A_{ref}}{A_{sam}} \cdot \left(\frac{n_{sam}}{n_{ref}}\right)^2 \quad (1)$$

Where  $\Phi$  is the fluorescence quantum yield,  $I$  is the integrated emission intensity,  $A$  is the absorbance, and  $n$  is the refractive index. The subscripts  $_{sam}$  and  $_{ref}$  stand for sample and reference, respectively. Herein, the N-CDs and Rhodamine B were dissolved in ultrapure water ( $n = 1.33$ ) and excited under 420 nm and kept the absorbance below 0.05.

## 2. Supplementary figures

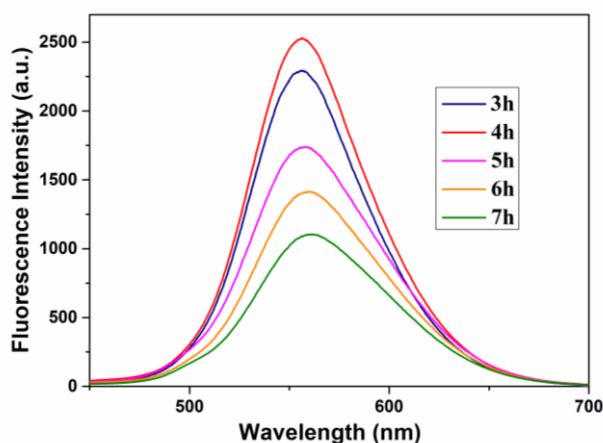

Fig.S1 Fluorescence emission spectra of the N-CDs based on o-phenylenediamine and formamide as the precursors with the mole ratio 1:1.5 at 150 °C for the different reaction times.

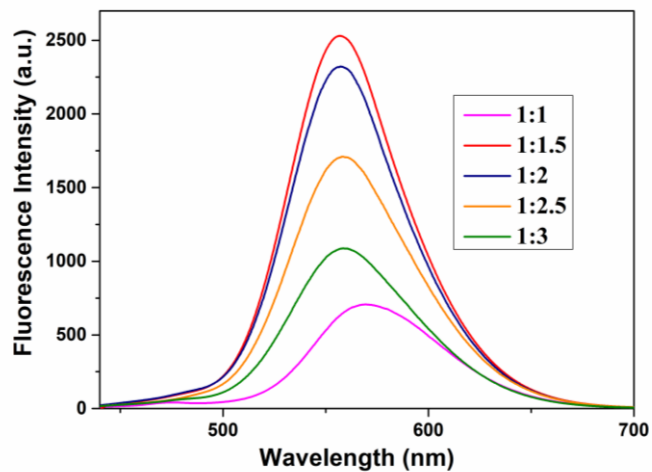

Fig.S2 Fluorescence emission spectra of the N-CDs based on o-phenylenediamine and formamide as the precursors at 150 °C for 4h with the different mole ratios between o-phenylenediamine and formamide.

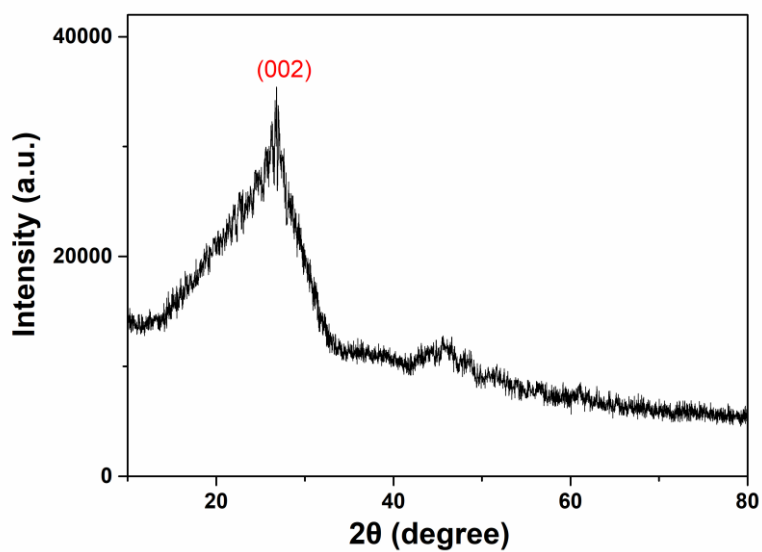

Fig.S3 XRD diffraction pattern of the N-CDs.

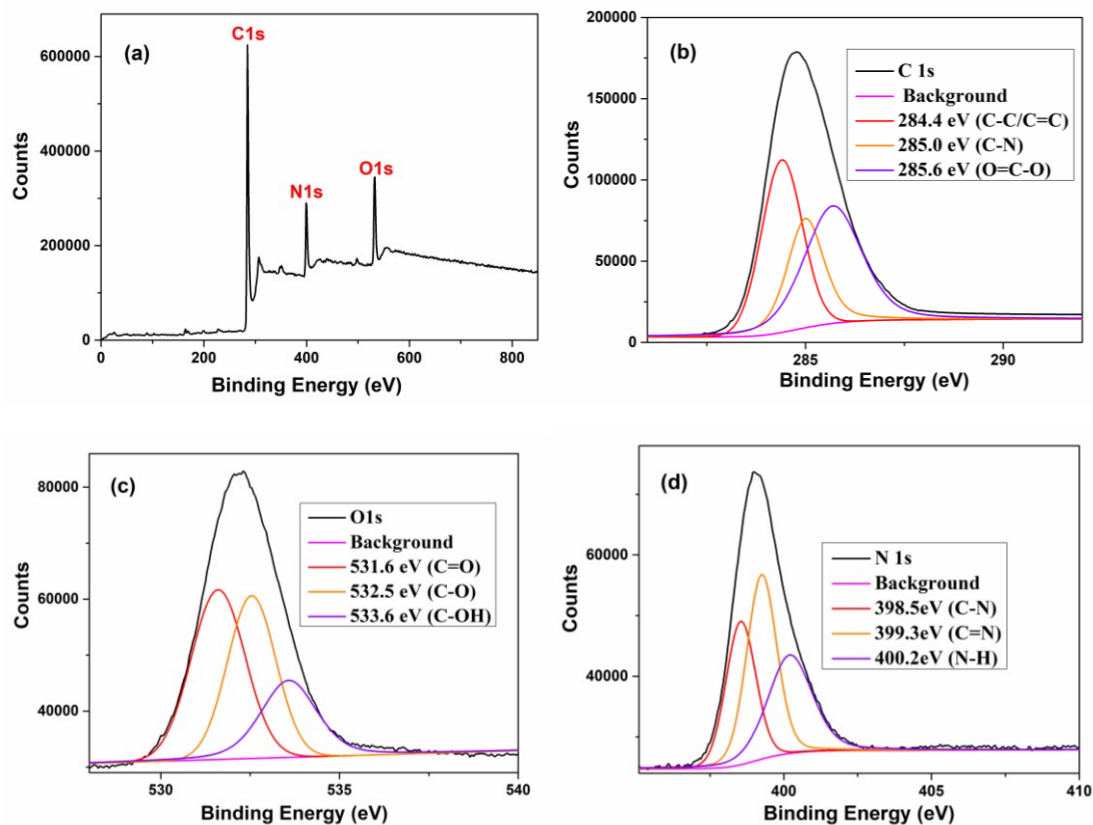

Fig.S4 (a) The full scan XPS of the N-CDs. High resolution XPS of C 1s (b), O 1s (c) and N 1s (d).

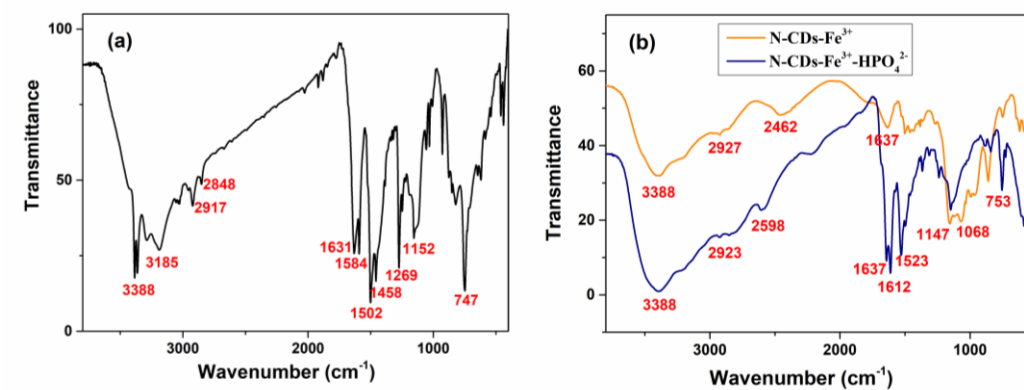

Fig.S5 Fourier transformed infrared spectra of the N-CDs (a) and the complexes of the N-CD-Fe<sup>3+</sup> and the [N-CD-Fe<sup>3+</sup>-HPO<sub>4</sub><sup>2-</sup>] (b).

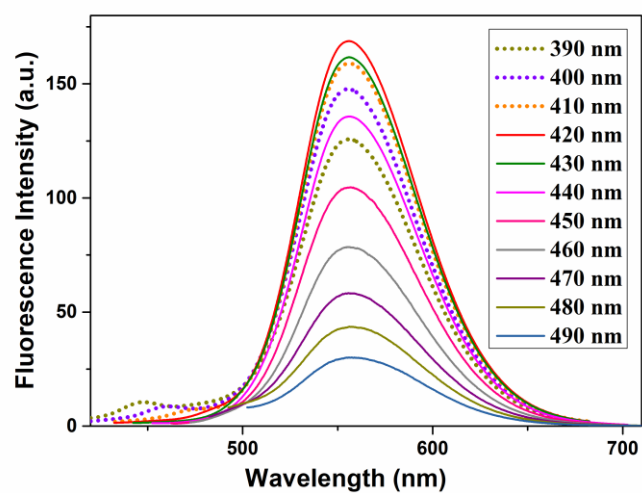

Fig.S6 The fluorescence emission spectra of the N-CDs at different excitation wavelengths.

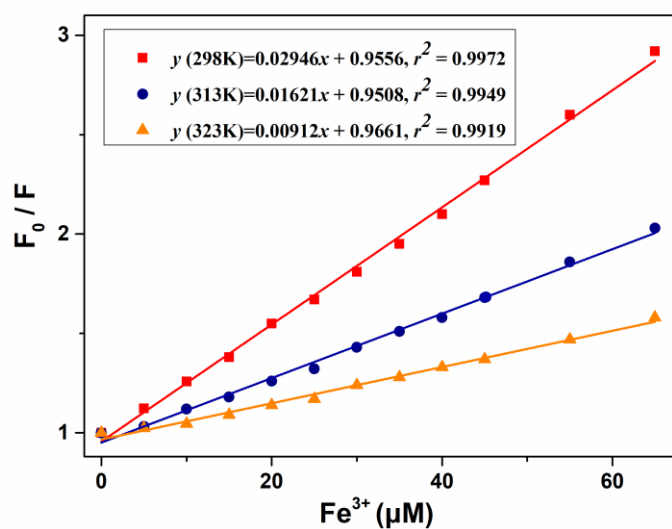

Fig.S7 Stern-Volmer plot at different temperatures (298 K, 318 K and 323K) and different concentrations of  $Fe^{3+}$  (0.3–65.0  $\mu M$ ).

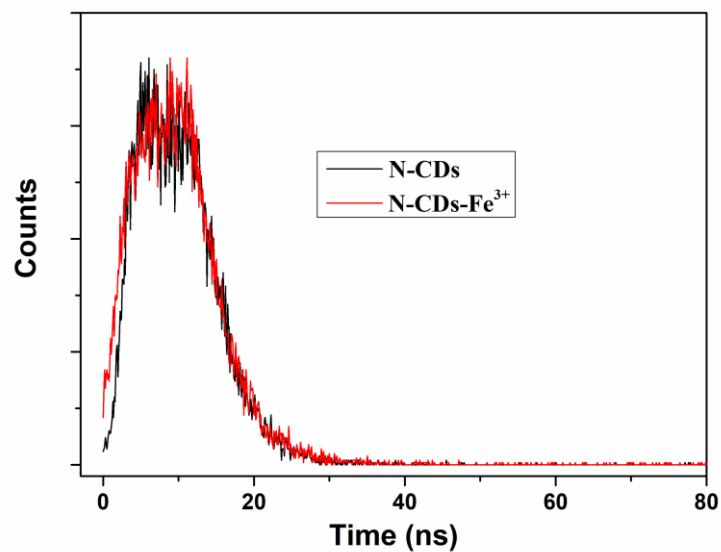

Fig.S8 Fluorescence lifetime decays of the N-CDs in the absence (black line) and presence (red line) of Fe<sup>3+</sup> under excitation of 450 nm.

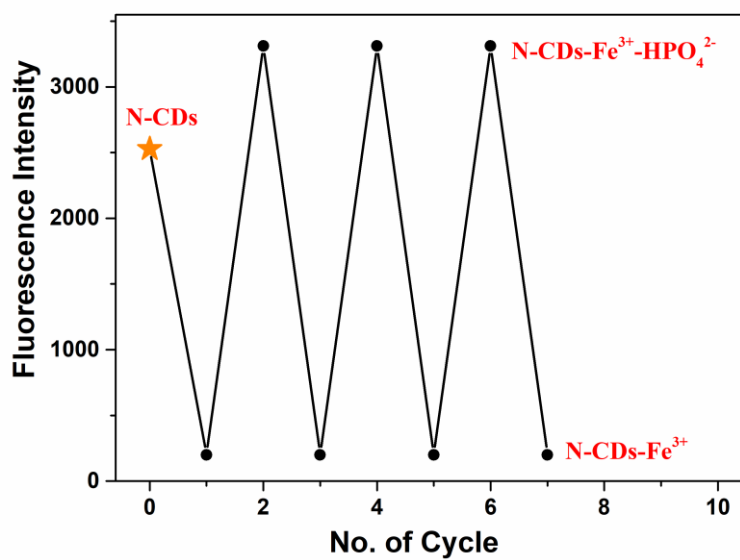

Fig.S9 Reversible fluorescence responses between N-CDs-Fe<sup>3+</sup> and HPO<sub>4</sub><sup>2-</sup> at 556 nm.

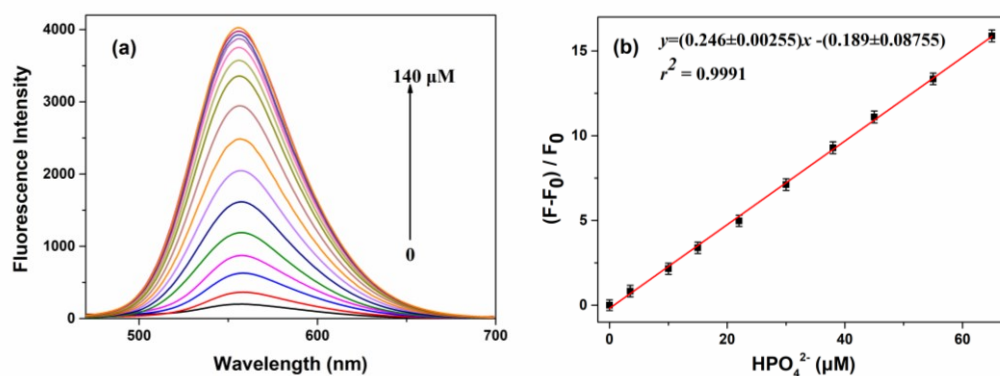

Fig.S10 (a) Fluorescence emission spectra of the N-CDs-Fe<sup>3+</sup> complex in the presence of different concentrations of HPO<sub>4</sub><sup>2-</sup> (0-140 μM). (b) Linear relationship between  $[(F-F_0)/F_0]$  and the concentration of HPO<sub>4</sub><sup>2-</sup>, where  $F_0$  and  $F$  are the fluorescence intensities of the N-CDs-Fe<sup>3+</sup> complex at 556 nm in the absence and presence of HPO<sub>4</sub><sup>2-</sup>, respectively. The excitation wavelength is 415 nm.

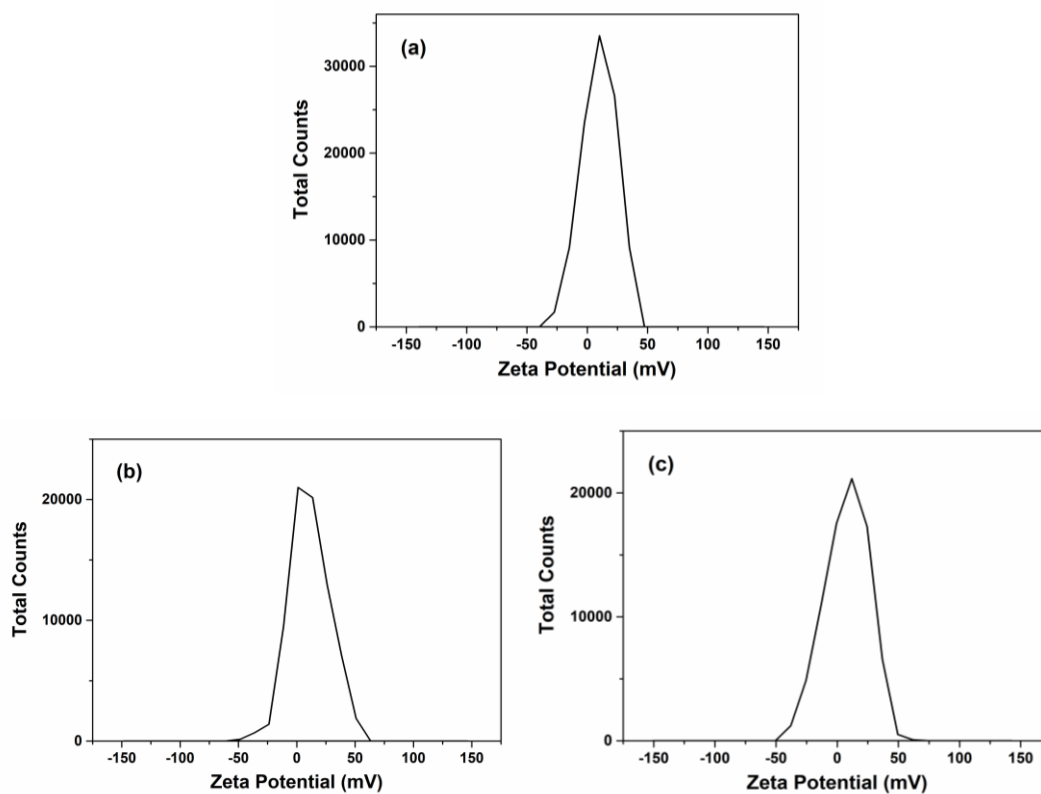

Fig.S11 Zeta potential plots of the N-CDs (a), the complexes of the N-CDs-Fe<sup>3+</sup> (b) and the [N-CDs-Fe<sup>3+</sup>-HPO<sub>4</sub><sup>2-</sup>] (c).

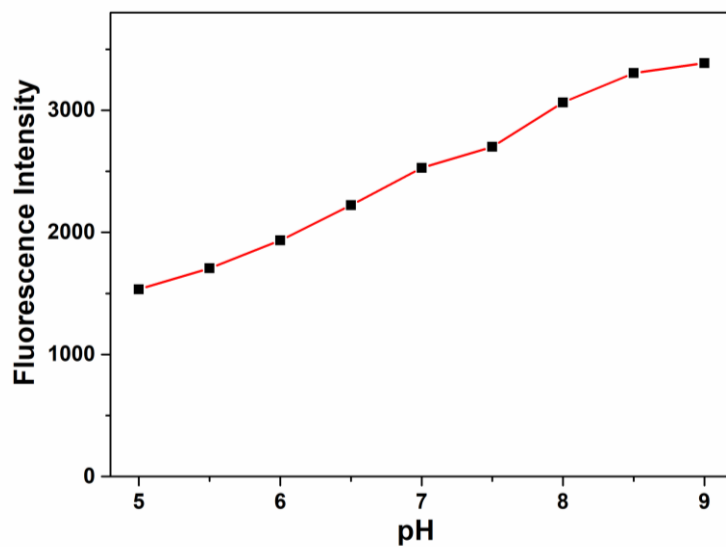

Fig.S12 Effect studies of pH on the fluorescence intensities of the N-CDs (0.04 mg/mL) at 556 nm.

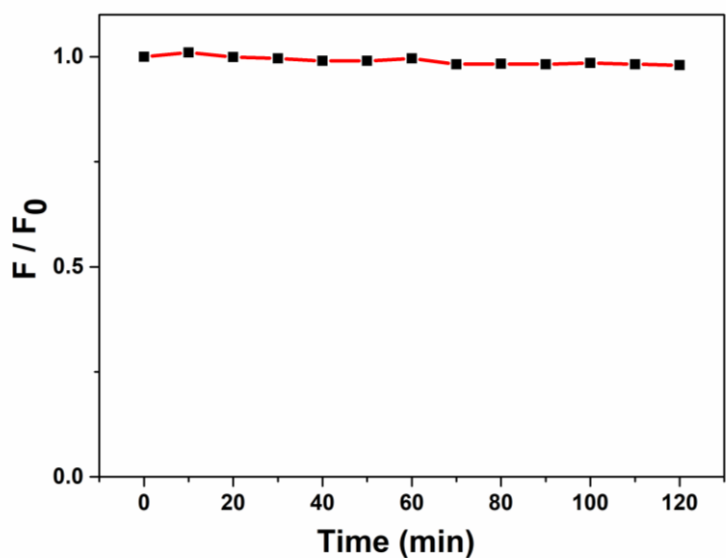

Fig.S13 Photostability studies of the N-CDs as a function of the continuous ultraviolet light at 365 nm for 120 min at 420 nm excitation wavelength.



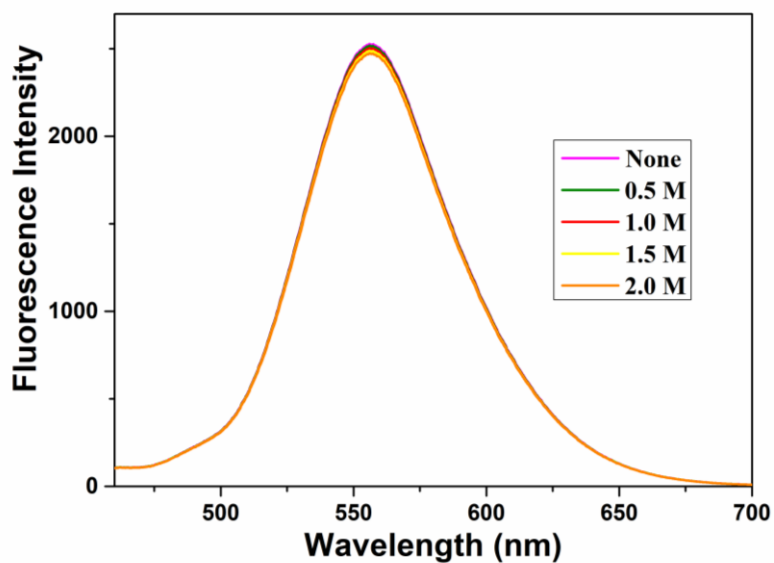

Fig.S14 The effect studies of the different ionic strengths (0.0-2.0 M KCl) on the fluorescence emission spectra of the N-CDs (0.04 mg/mL) at 420 nm excitation wavelength.

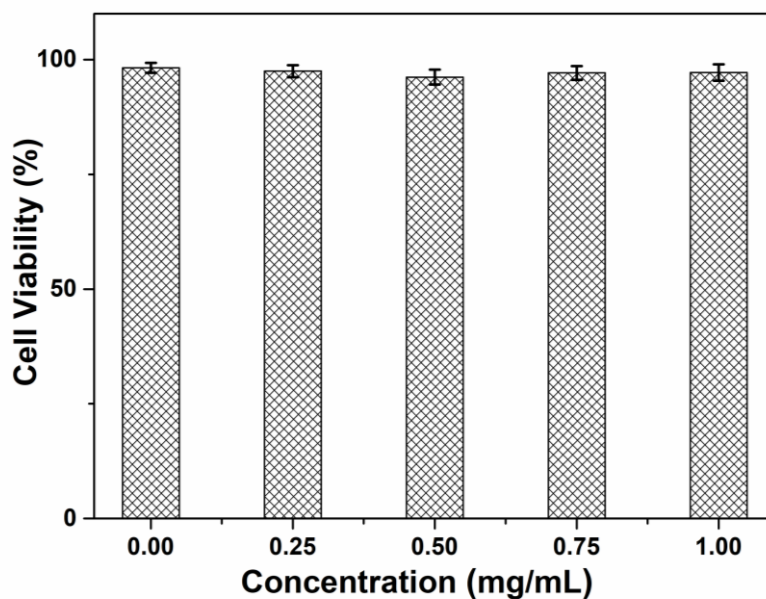

Fig.S15 Cytotoxic assays of the different concentrations of the N-CDs on HEp-2 Cells.

**Table S1** Comparison between the reported carbon dots for Fe<sup>3+</sup> sensing and the N-CDs

| <b>Kinds of carbon dots</b> | <b>Ex/Em (nm)</b> | <b>Stokes shift</b> | <b>QYs</b> | <b>Detection limit (μM)</b> | <b>ref</b> |
|-----------------------------|-------------------|---------------------|------------|-----------------------------|------------|
| <b>N/P-CDs</b>              | 320/408           | 88                  | 43.2 %     | 0.33 μM                     | 3          |
| <b>CDs</b>                  | 360/442           | 82                  | 8.64 %     | 0.32 μM                     | 4          |
| <b>N-CDs</b>                | 350/420           | 70                  | 14 %       | 0.9 μM                      | 5          |
| <b>Si-CDs</b>               | 390/520           | 130                 | 27.2 %     | 13.7 nM                     | 6          |
| <b>CDs</b>                  | 340/426           | 86                  | 10.5 %     | 0.2 μM                      | 7          |
| <b>N-CQDs</b>               | 360/440           | 80                  | 23.48 %    | 0.7462 μM                   | 8          |
| <b>CDs</b>                  | 360/436           | 76                  | 6.2 %      | 128 nM                      | 9          |
| <b>CDs</b>                  | 380/450           | 70                  | 10.85 %    | 9.55 μM                     | 10         |
| <b>N-GQDs</b>               | 332/440           | 108                 | 23.3 %     | 90 nM                       | 11         |
| <b>N-CDs</b>                | 330/420           | 90                  | 13.6 %     | 0.13 μM                     | 12         |
| <b>N-CDs</b>                | 340/450           | 110                 | 70 %       | 107 nM                      | 13         |
| <b>CDs</b>                  | 360/450           | 90                  | 9.8 %      | 0.0154 μM                   | 14         |
| <b>N-CDs</b>                | 355/442           | 87                  | 27 %       | 0.01 μM                     | 15         |
| <b>N,Zn-CDs</b>             | 350/450           | 100                 | 63.28 %    | 0.027 μM                    | 16         |
| <b>N,S-CDs</b>              | 360/443           | 83                  | 28.9 %     | 0.16 μM                     | 17         |
| <b>F-CDs</b>                | 320/447           | 127                 | 35.2 %     | 10 nM                       | 18         |
| <b>N-CDs</b>                | 360/438           | 78                  | 54 %       | 42nM                        | 19         |
| <b>CQDs</b>                 | 400/510           | 110                 | 15 %       | 50 nM                       | 20         |
| <b>BNS-CDs</b>              | 500/600           | 100                 | 5.44 %     | 90 nM                       | 21         |
| <b>N-CDs</b>                | 420/510           | 90                  | 21.5 %     | 0.18 μM                     | 22         |
| <b>N-CDs</b>                | 450/556           | 106                 | 20 %       | 0.85 μM.                    | This work  |

**Table S2.** Comparison between the organic dyes and the N-CDs

| Anion                                          | E <sub>x</sub> / E <sub>m</sub> (nm) | Stokes shift | Detection limit (μM) | Ref.      |
|------------------------------------------------|--------------------------------------|--------------|----------------------|-----------|
| [H <sub>2</sub> PO <sub>4</sub> ] <sup>-</sup> | 365/495                              | 131          | 0.176                | 23        |
| [H <sub>2</sub> PO <sub>4</sub> ] <sup>-</sup> | 365/401                              | 36           | 0.046                | 24        |
| [H <sub>2</sub> PO <sub>4</sub> ] <sup>-</sup> | 330/535                              | 205          | 0.0165               | 25        |
| [H <sub>2</sub> PO <sub>4</sub> ] <sup>-</sup> | 365/450                              | 85           | 0.12                 | 26        |
| [H <sub>2</sub> PO <sub>4</sub> ] <sup>-</sup> | 480/550                              | 70           | 3.5                  | 27        |
| [H <sub>2</sub> PO <sub>4</sub> ] <sup>-</sup> | 534/560                              | 26           | 0.015                | 28        |
| [H <sub>2</sub> PO <sub>4</sub> ] <sup>-</sup> | 554/612                              | 58           | 0.0169               | 29        |
| [HPO <sub>4</sub> ] <sup>2-</sup>              | 256/368                              | 112          | 0.071                | 30        |
| [HPO <sub>4</sub> ] <sup>2-</sup>              | 460/496                              | 36           | 0.025                | 31        |
| [HPO <sub>4</sub> ] <sup>2-</sup>              | 494/ 526                             | 32           | 0.0621               | 32        |
| [HPO <sub>4</sub> ] <sup>2-</sup>              | 440/595                              | 155          | 0.312                | 33        |
| [HPO <sub>4</sub> ] <sup>2-</sup>              | 450/556                              | 106          | 0.80                 | This work |

### 3. References

1. M. Zhang, Y. Gao, M. Li, M. Yu, F. Li, L. Li, M. Zhu, J. Zhang, T. Yi, C. Huang, *Tetrahedron Lett.* **2007**, *48*, 3709-3712.
2. Z. Qu, X. Zhou, L. Gu, R. Lan, D. Sun, D. Yu, G. Shi, *Chem. Commun.*, **2013**, *49*, 9830-9832.
3. J. Shangguan, J. Huang, D. He, X. He, K. Wang, R. Ye, X. Yang, T. Qing, J. Tang, *Anal. Chem.*, **2017**, *89*, 7477-7484.
4. J. Shen, S. Shang, X. Chen, D. Wang, Y. Cai, *Mater. Sci. Eng. C*, **2017**, *76*, 856-864.
5. R. Atchudana, T. N. J. I. Edison, K. R. Aseer, S. Perumalc, N. Karthika, Y. R. Lee, *Biosens. Bioelectron.*, **2018**, *99*, 303-311.
6. M. Shamsipur, K. Molaei, F. Molaabasi, M. Alipour, N. Alizadeh, S. Hosseinkhani, M. Hosseini, *Talanta*, **2018**, *183*, 122-130.
7. C. Sun, Y. Zhang, P. Wang, Y. Yang, Y. Wang, J. Xu, Y. Wang, W. W. Yu, *Nanoscale Res. Lett.*, **2016**, *11*, 110.
8. H. Qi, M. Teng, M. Liu, S. Liu, J. Li, H. Yu, C. Teng, Z. Huang, H. Liu, Q. Shao, A. Umar, T. Ding, Q. Gao, Z. Guo, *J. Colloid Interf. Sci.*, **2019**, *539*, 332-341.
9. S. Jayaweera, Y. Ke, X. Hu, W. J. Ng, *J. Photoch. Photobio. A*, **2019**, *370*, 156-163.

10. M. Zulfajri, G. Gedda, C. J. Chang, Y. P. Chang, G. G. Huang, *ACS Omega*, 2019, 4, 15382-15392.
11. J. Ju, W. Chen, *Biosens. Bioelectron.*, 2014, 58, 219-225.
12. W. Liu, H. Diao, H. Chang, H. Wang, T. Li, W. Wei, *Sensor. Actuat. B*, 2017, 241, 190-198.
13. L.J. Mohammed, K.M. Omer, *Sci. Rep.*, 2020, 10, 3028.
14. W. Zhang, L. Jia, X. Guo, R. Yang, Y. Zhang and Z. Zhao, *Analyst*, 2019, 144, 7421-7431.
15. Q. Huang, Q. Li, Y. Chen, L. Tong, X. Lin, J. Zhu, Q. Tong, *Sensor. Actuat. B*, 2018, 276, 82-88.
16. S. K. Tammina, D. Yang, X. Li, S. Koppala, Y. Yang, *Spectrochim. Acta A*, 2019, 222, 117141.
17. K. K. Chan, C. Yang, Y. H. Chien, N. Panwara and K. T. Yong, *New J. Chem.*, 2019, 43, 4734-4744.
18. D. Hong, X. Deng, J. Liang, J. Li, Y. Tao, K. Tan, *Microchem. J.*, 2019, 151, 104217.
19. L. Li, L. Shi, J. Jia, D. Chang, C. Dong, S. Shuang, *Analyst*, 2020, 145, 5450-5457.
20. K. M. Omer, D. I. Tofiq, A. Q. Hassan, *Mikrochim Acta*. 2018, 185, 466.
21. Y. Liu, W. Duan, W. Song, J. Liu, C. Ren, J. Wu, D. Liu, H. Chen, *ACS Appl. Mater. Interfaces*, 2017, 9, 12663-12672.
22. H. Deng, C. Tian, Z. Gao, S. W. Chen, Y. Li, Q. Zhang, R. Yu, and J. Wang, *Analyst*, 2020, 145, 4931-4936.
23. B. Turfan, E. U. *Org. Lett.*, 2002, 4, 2857-2859.
24. T. Mineno, T. Ueno, Y. Urano, H. Kojima, T. Nagano, *Org. Lett.*, 2006, 8, 5963-5966.
25. K. Du, J. Liu, R. Shen, P. Zhang, *Luminescence*, 2019, 34, 407-414.
26. C. Guo, S. Sun, Q. He, V. M. Lynch, J. L. Sessler, *Org. Lett.*, 2018, 20, 5414-5417.
27. L. He, R. P. Zuo, B. Wei, H. Tao, Q. Y. Cao, *Dyes. Pigments*, 2019, 168, 205-211.
28. J. Wu, X. Zhao, Y. Gao, J. Hu, Y. Ju, *Sensor. Actuat. B*, 2015, 221, 334-340.
29. S. Sen, M. Mukherjee, K. Chakrabarty, I. Hauli, S. K. Mukhopadhyay, P. Chattopadhyay, *Org. Biomol. Chem.*, 2013, 11, 1537-1544.
30. K. P. Wang, S. J. Zhang, C. D. Lv, H. S. Shang, Z. H. Jin, S. Chen, Q. Zhang, Y. B. Zhang, Z. Q. Hu, *Sensor. Actuat. B*, 2017, 27, 791-796.
31. T. Wei, G. Wu, B. Shi, Q. Lin, H. Yao, Y. Zhang, *Chin. J. Chem.*, 2014, 32, 1238-1244.

32. H. Tavallali, G. Deilamy-Rad, A. Moaddeli, K. Asghari, *Spectrochim. Acta A*, 2017, 183, 319-331.
33. M. R. Ganjalnia, M. Hosseini, Z. Memari, F. Faridbod, P. Norouzi, H. Goldooz, A. Badiei, *Anal. Chim. Acta*, 2011, 708, 107-110.
